# Supplementary material
Source: PubMed Central journal article supplement (PMC6288146)

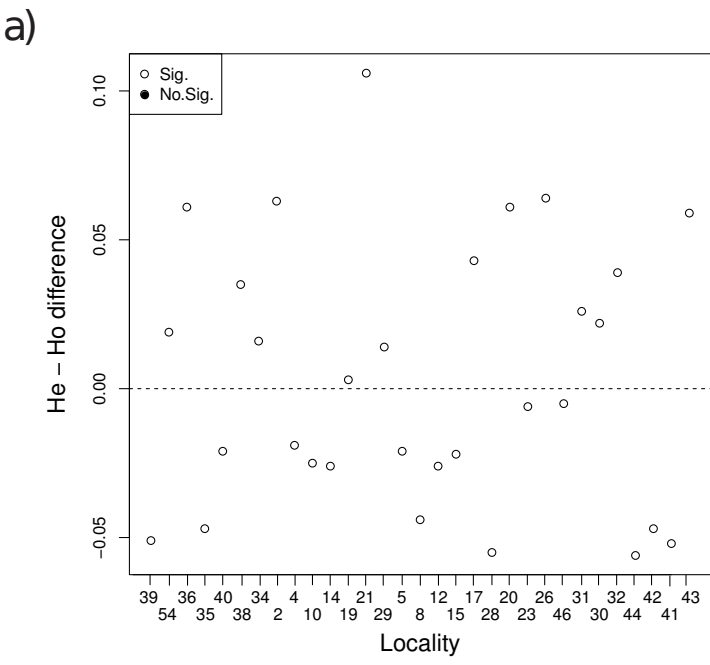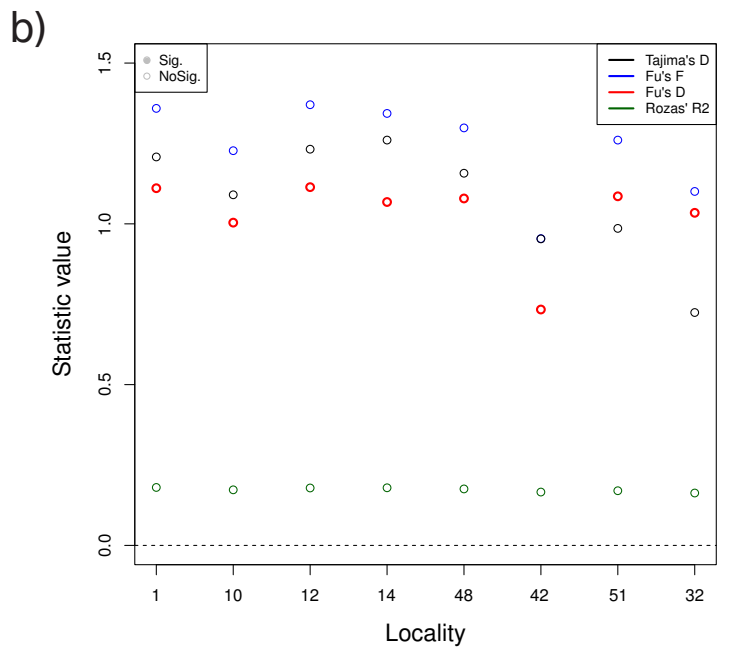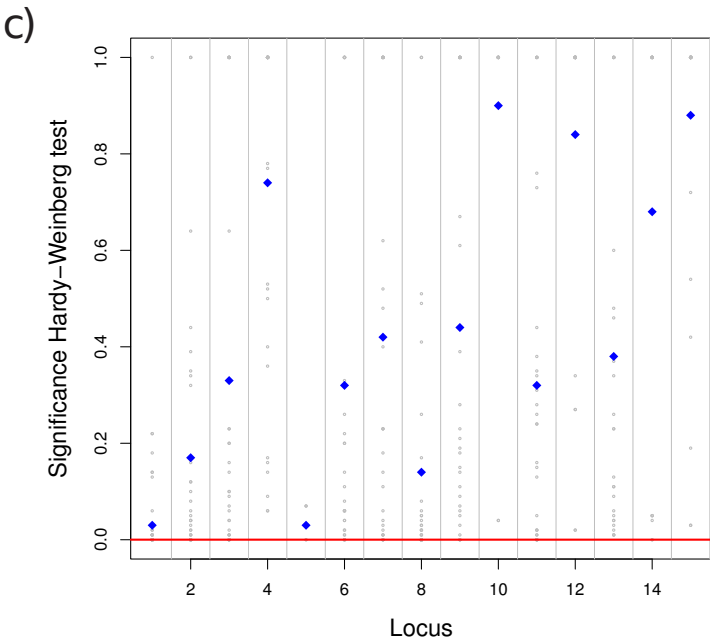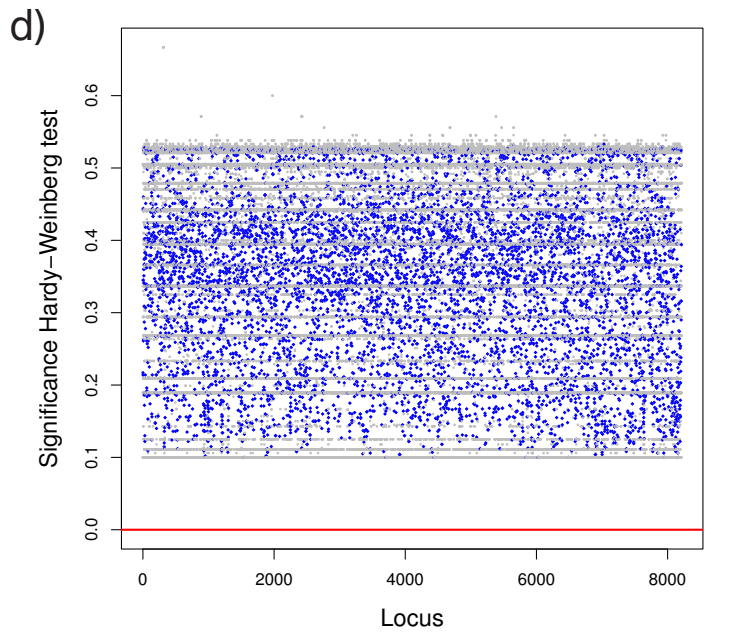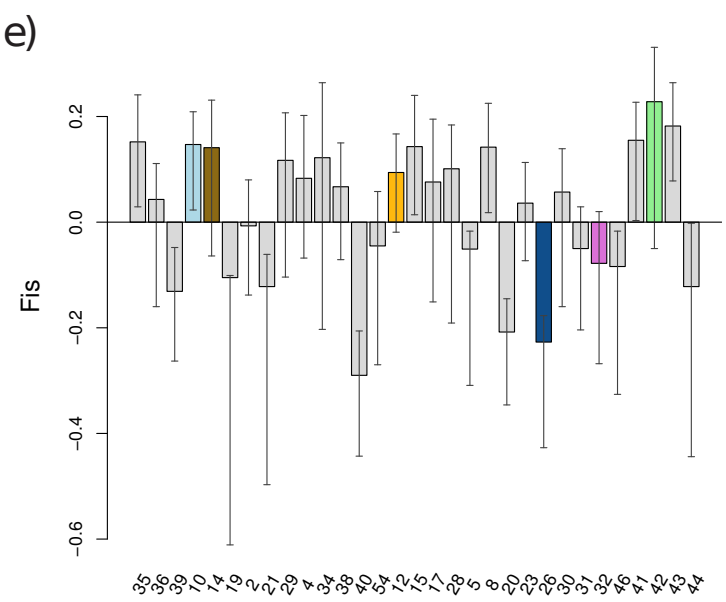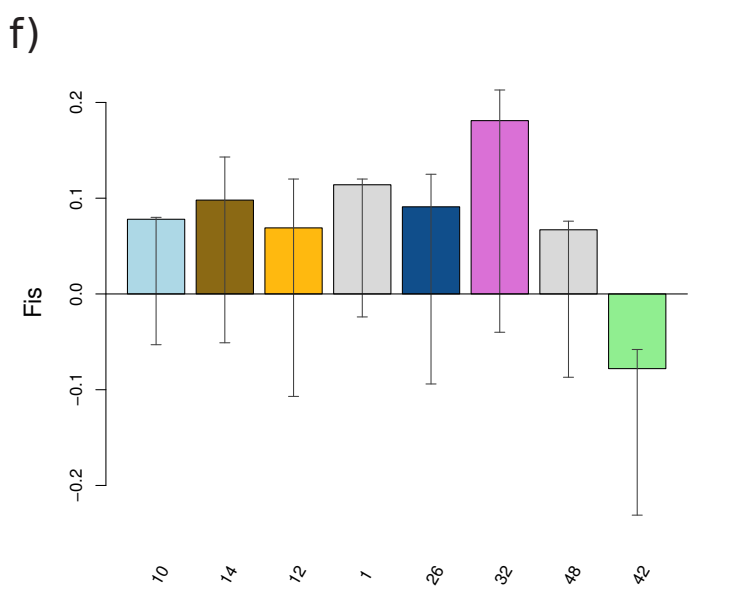

Supplement: 41437_2018_106_MOESM2_ESM.pdf [file 41437_2018_106_MOESM2_ESM.pdf]

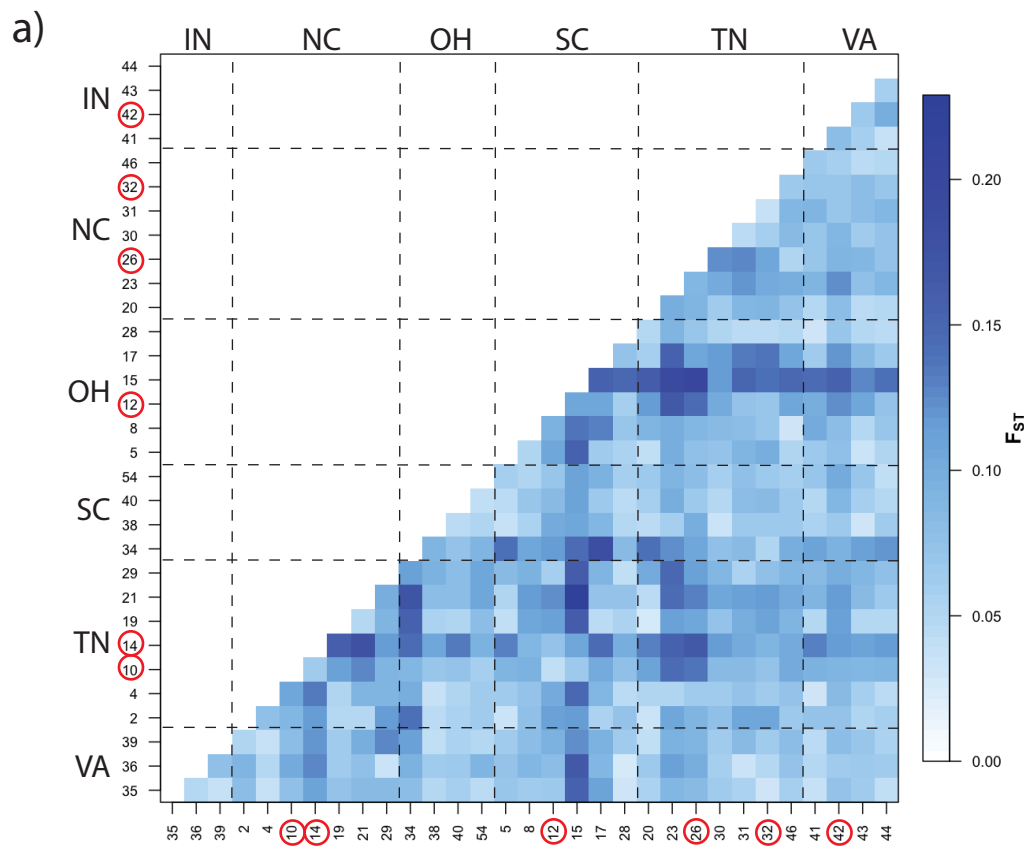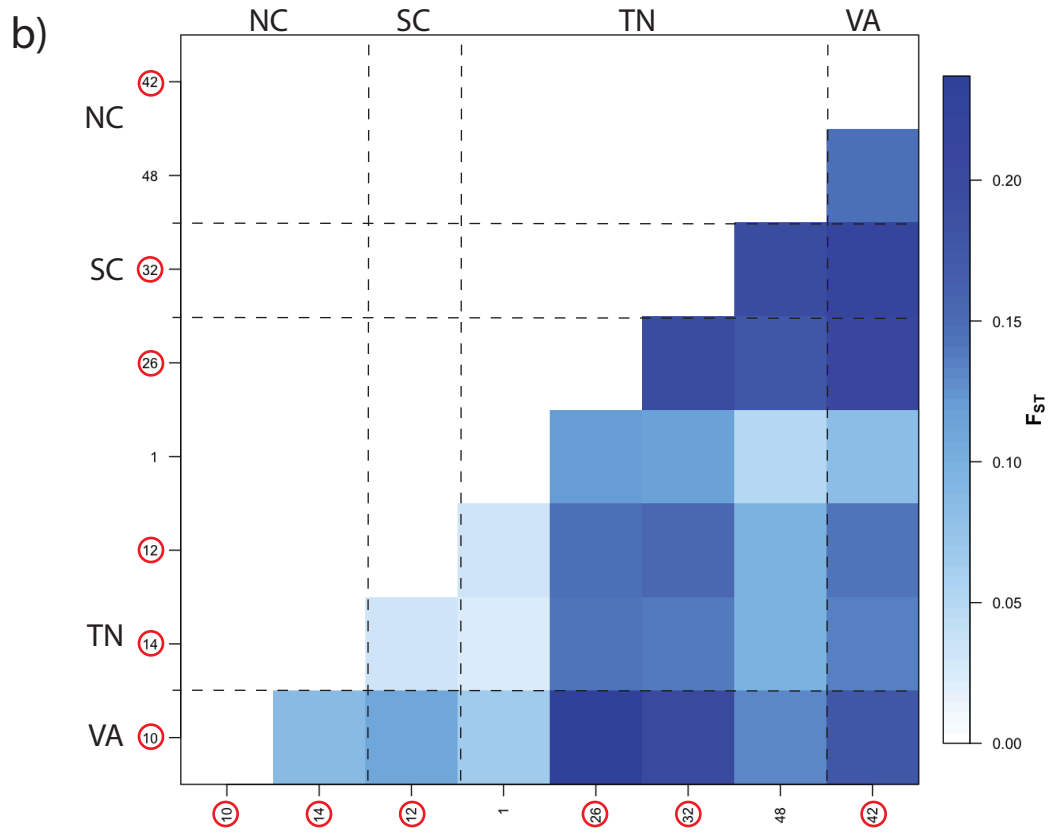

Supplement: 41437_2018_106_MOESM3_ESM.pdf [file 41437_2018_106_MOESM3_ESM.pdf]

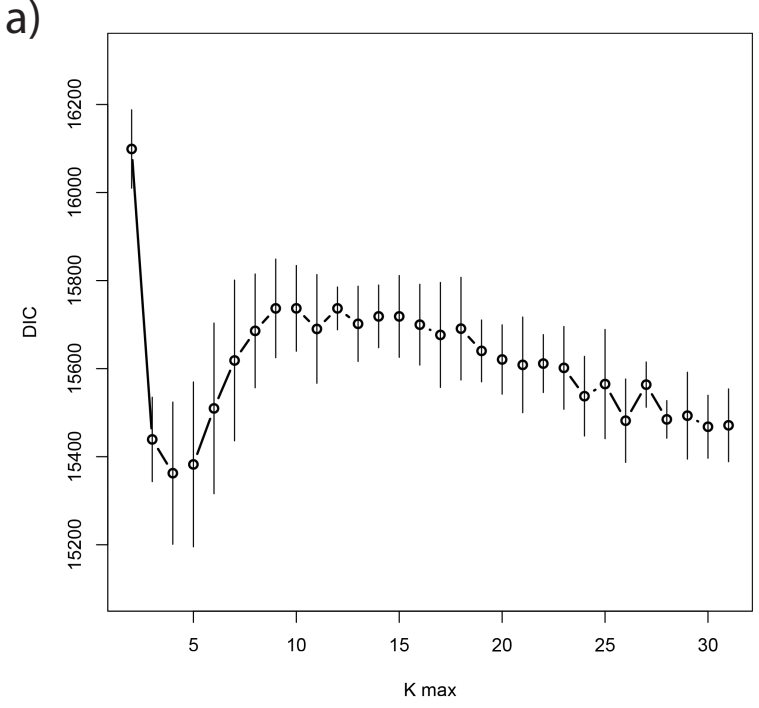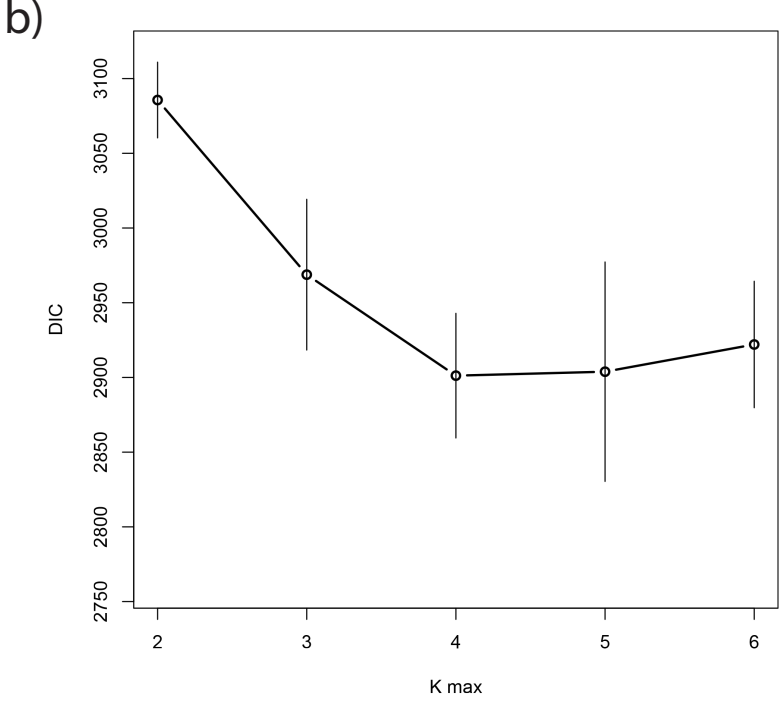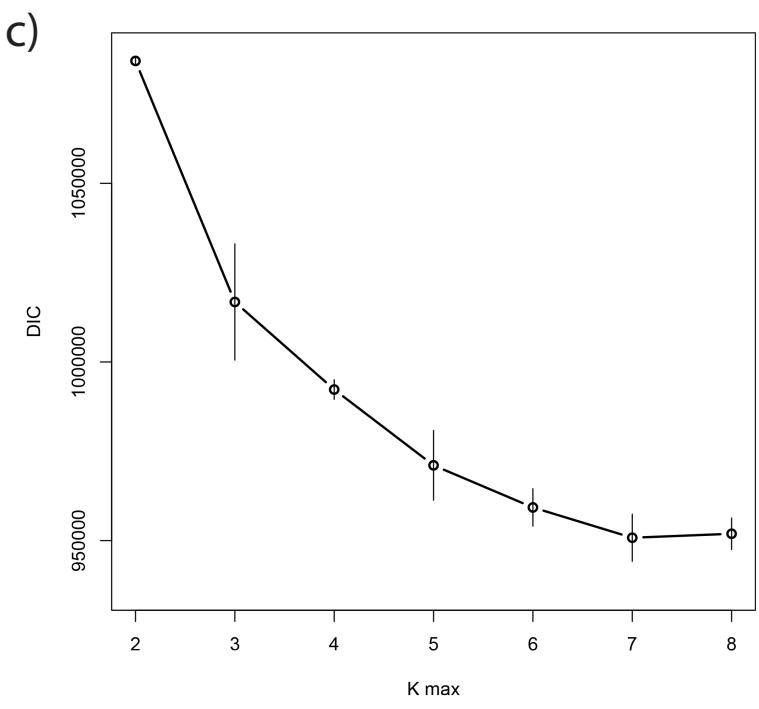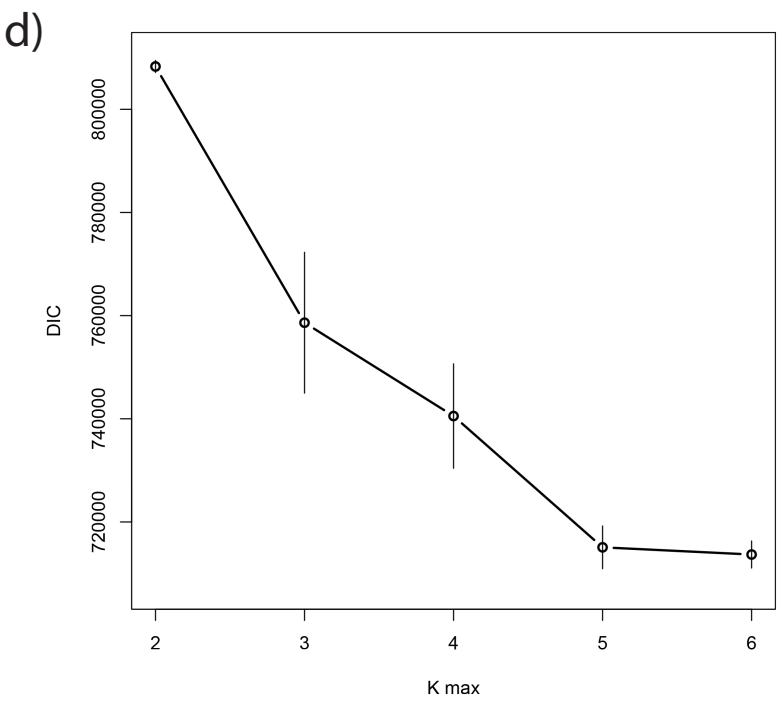

Supplement: 41437_2018_106_MOESM4_ESM.pdf [file 41437_2018_106_MOESM4_ESM.pdf]

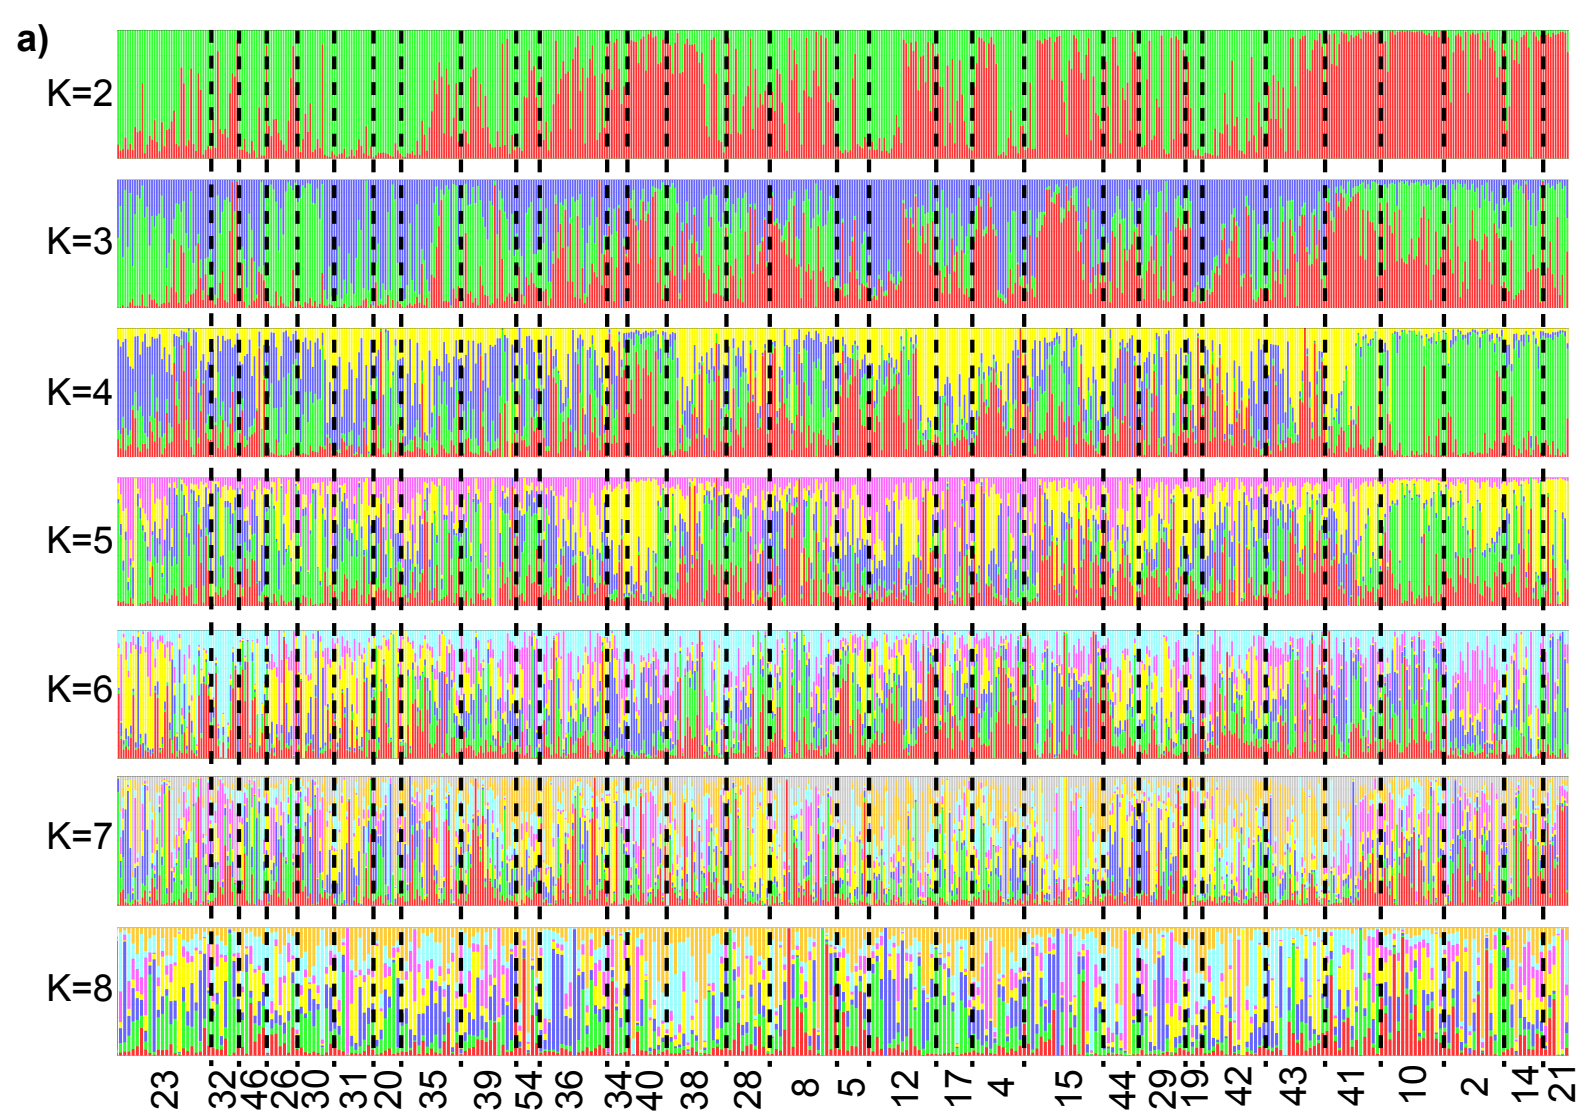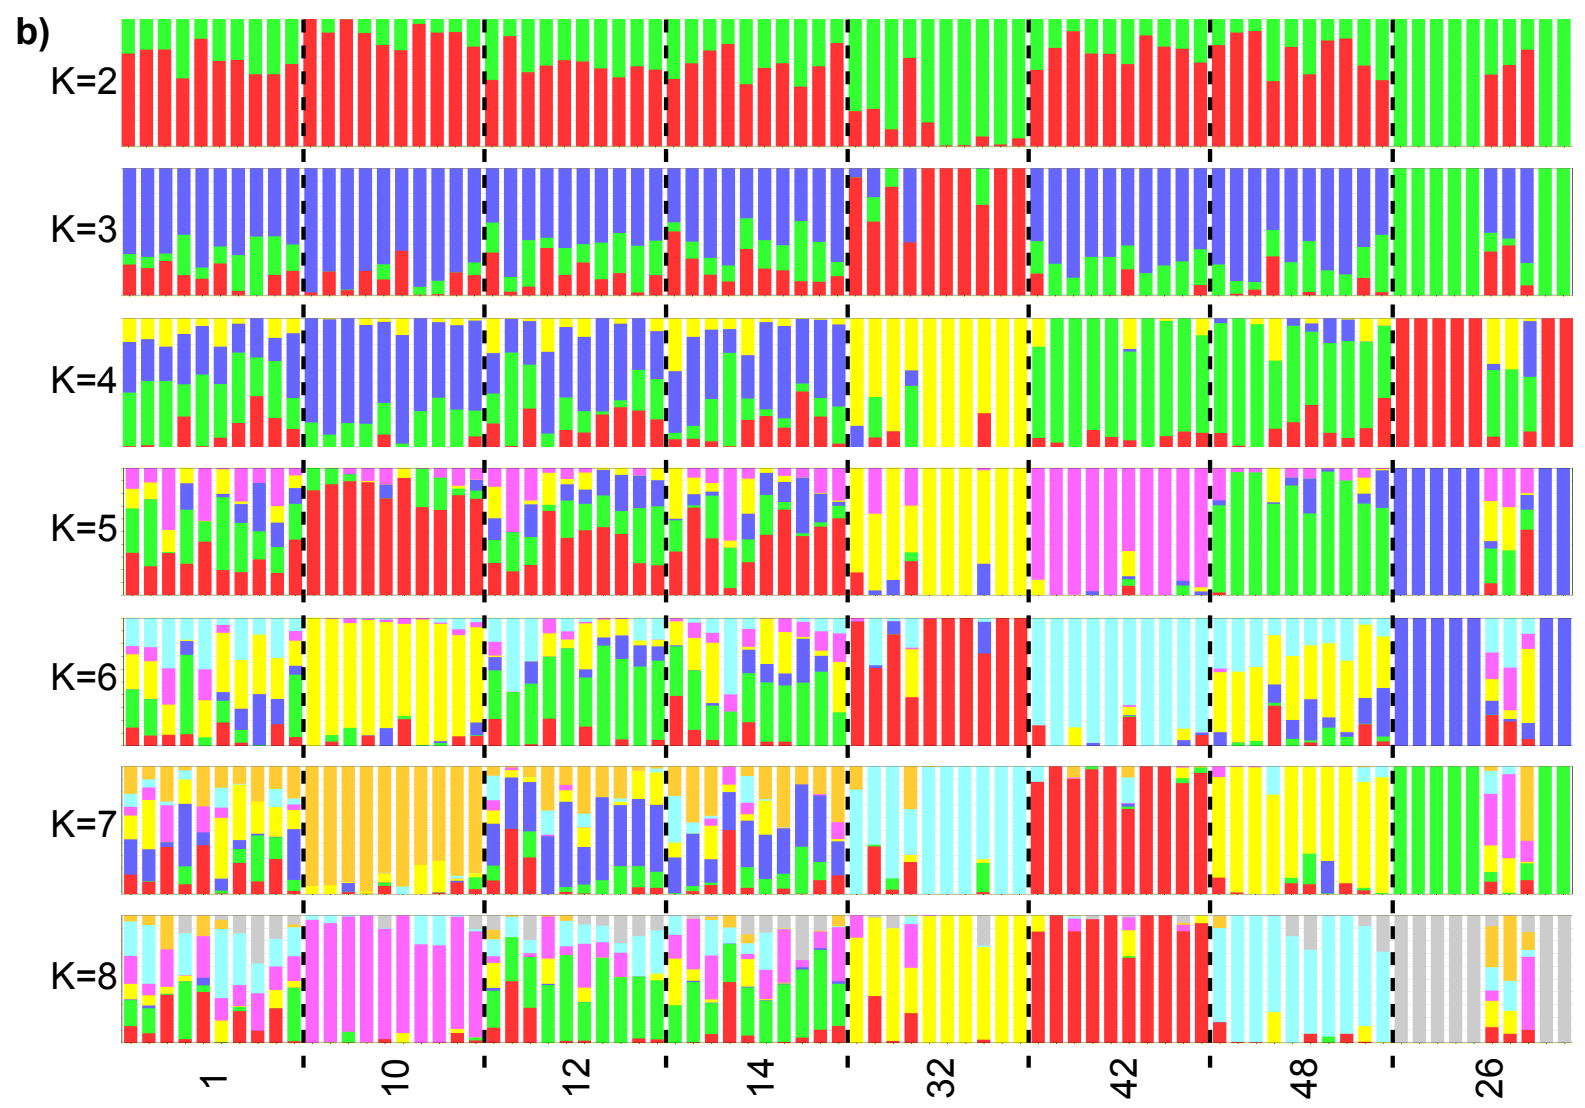

Supplement: 41437_2018_106_MOESM5_ESM.pdf [file 41437_2018_106_MOESM5_ESM.pdf]

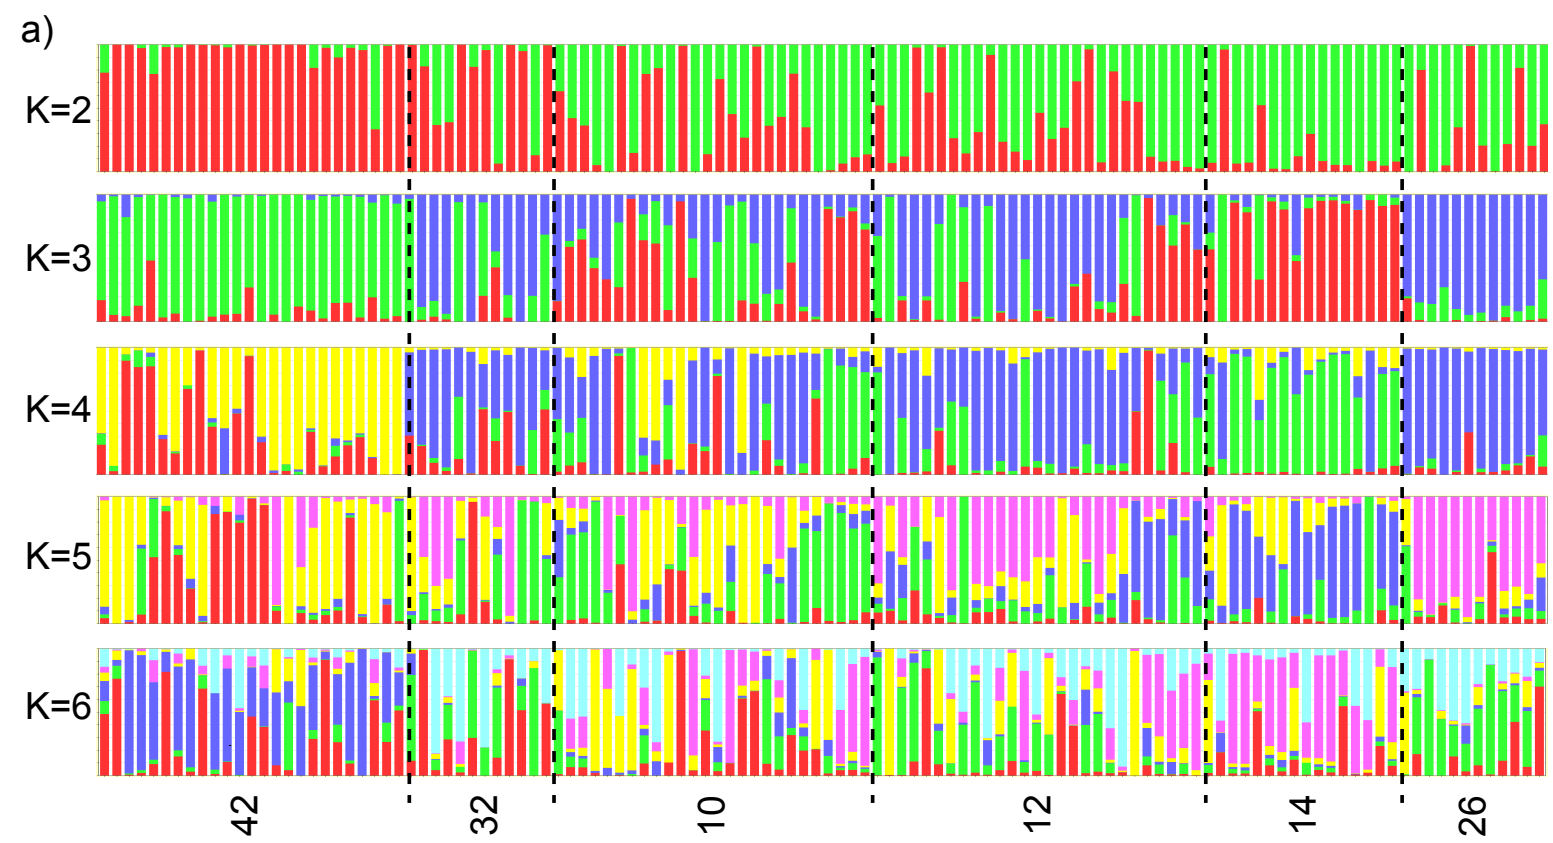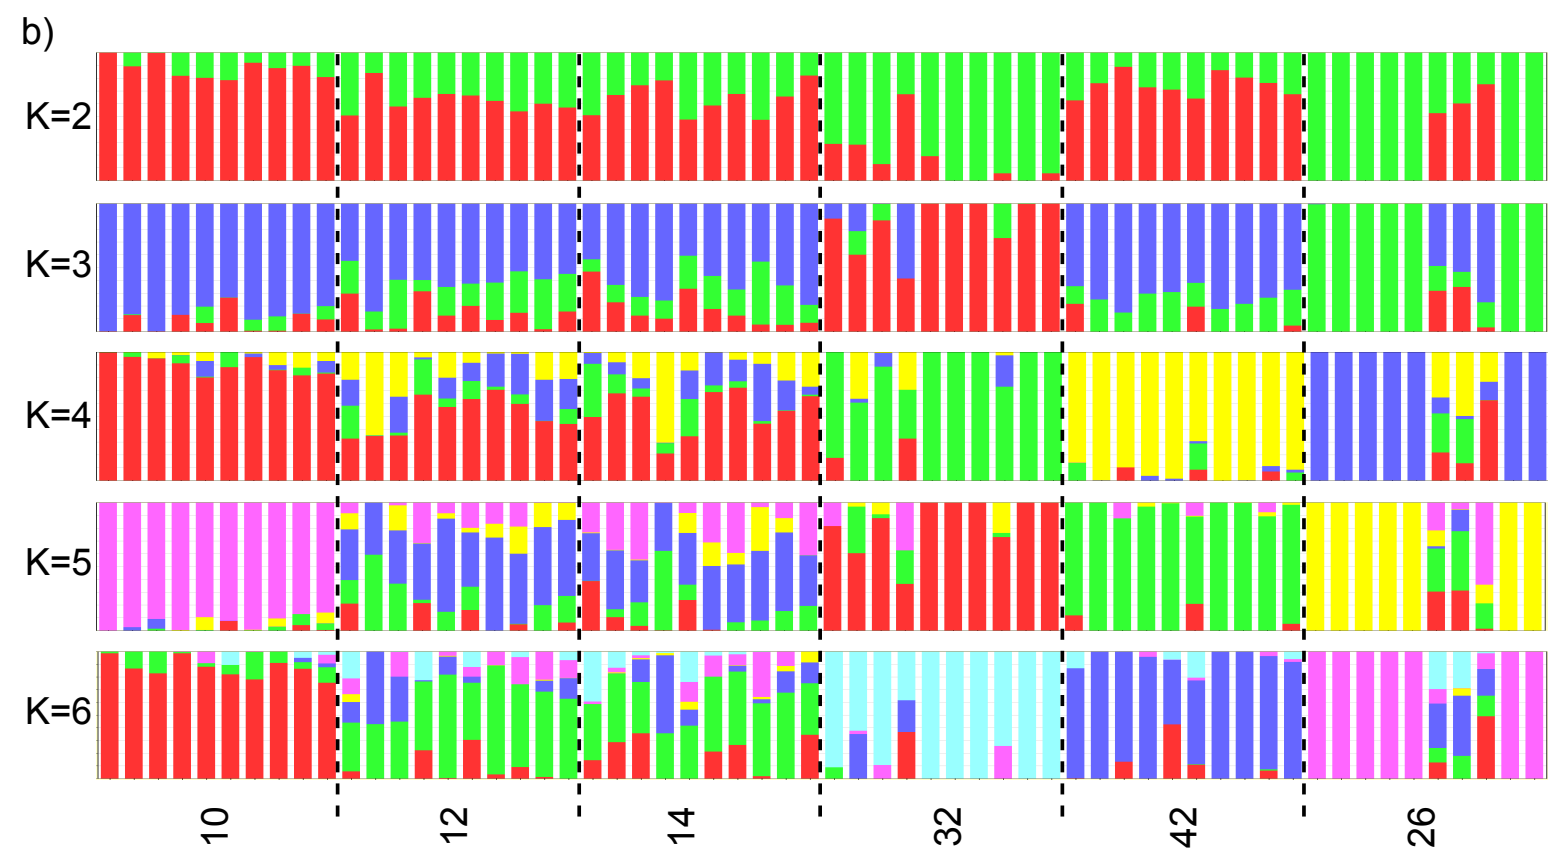

Supplement: 41437_2018_106_MOESM6_ESM.pdf [file 41437_2018_106_MOESM6_ESM.pdf]

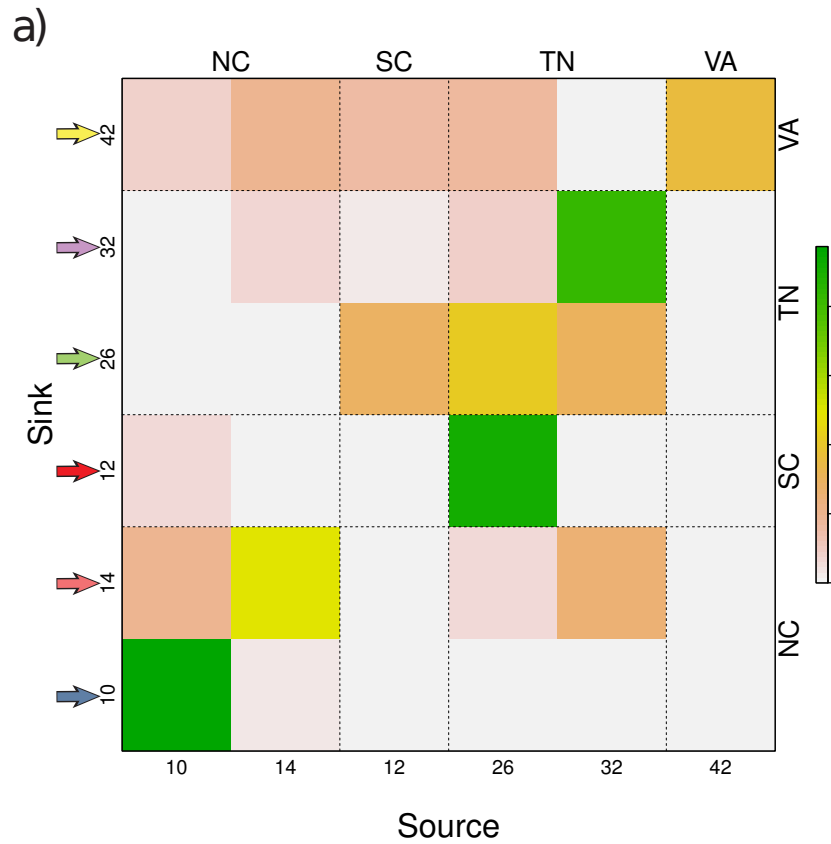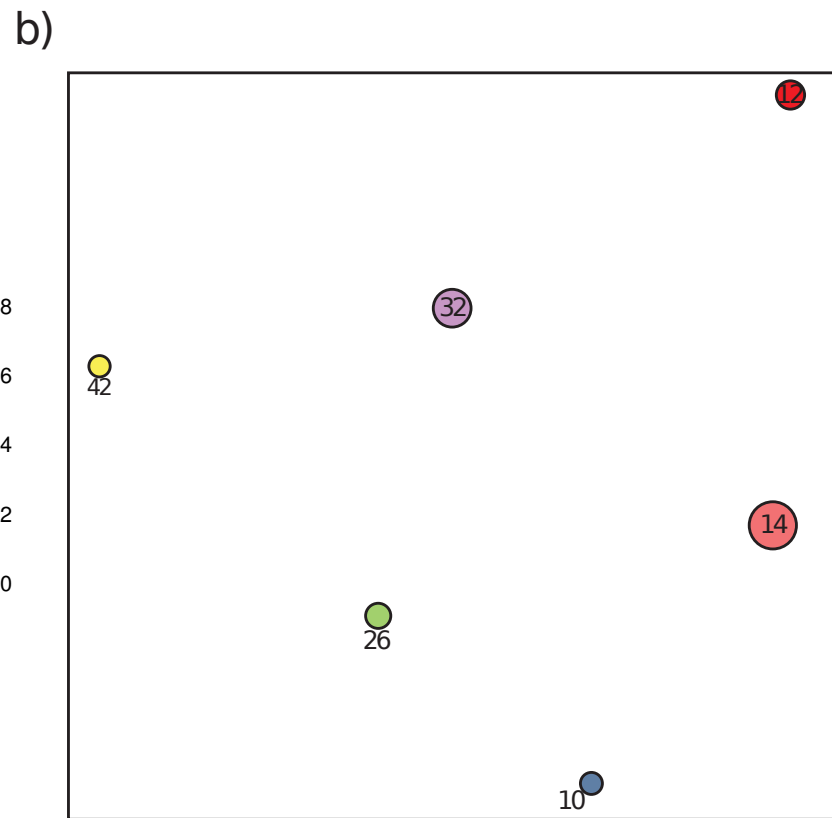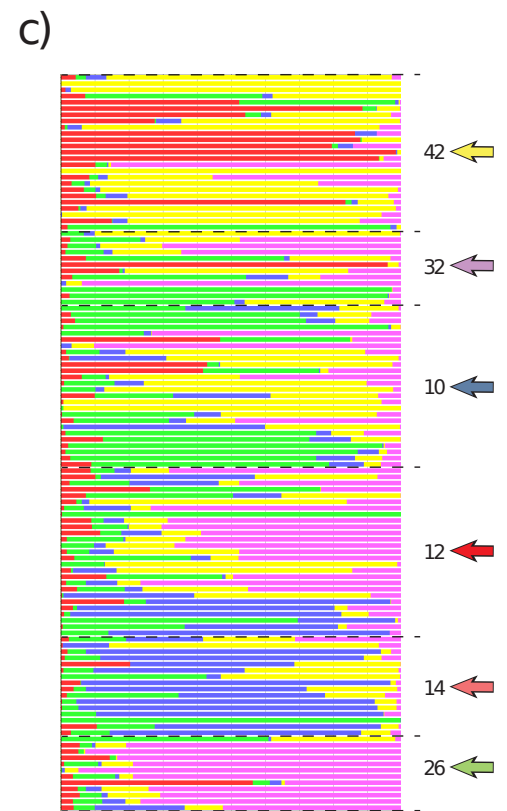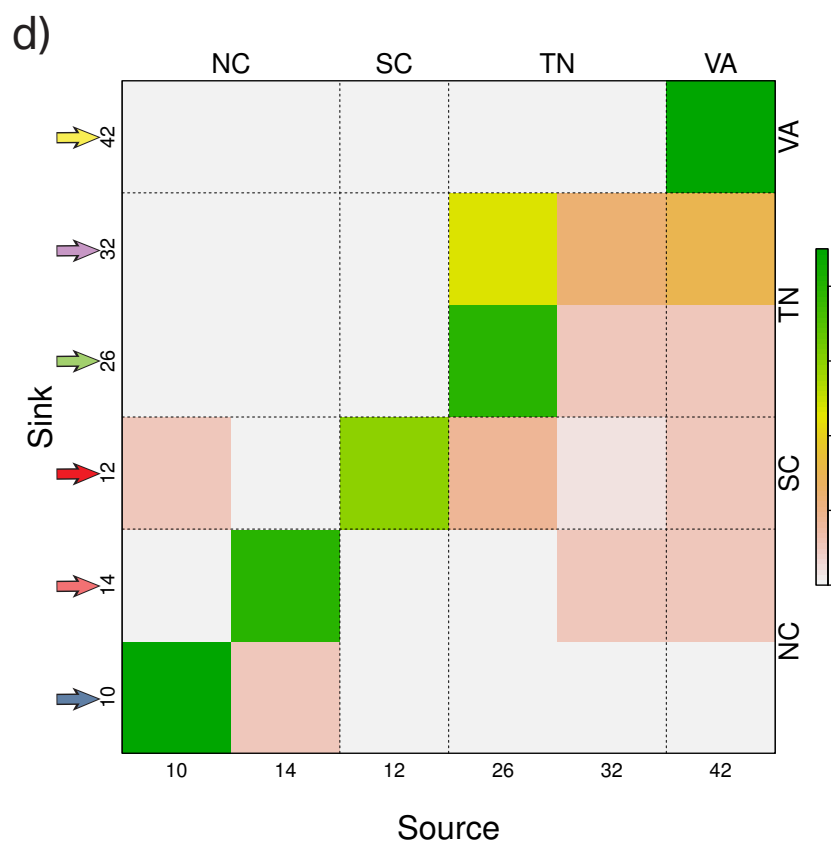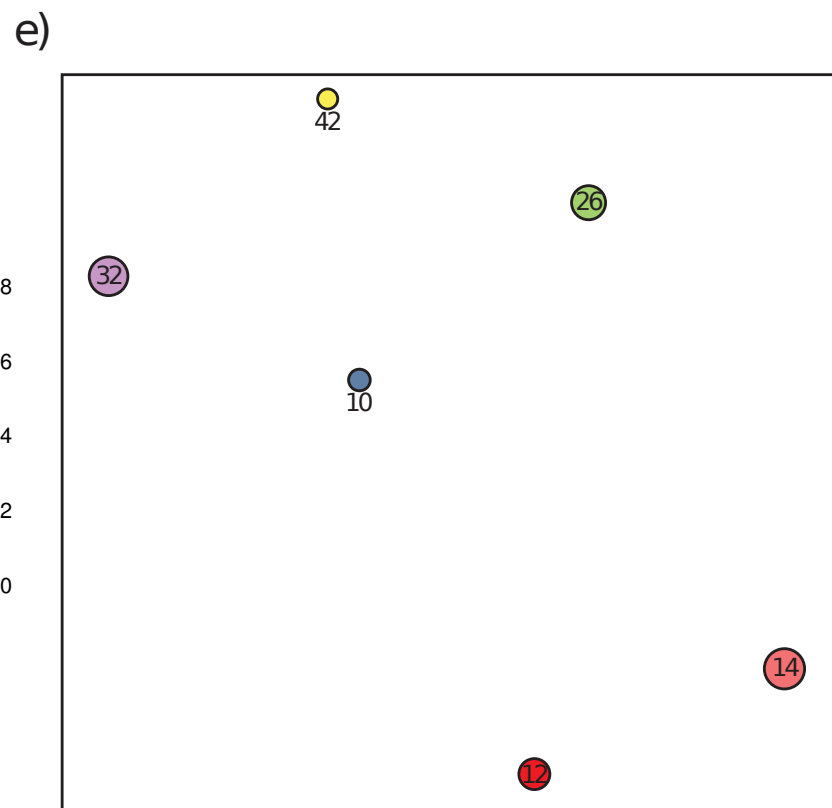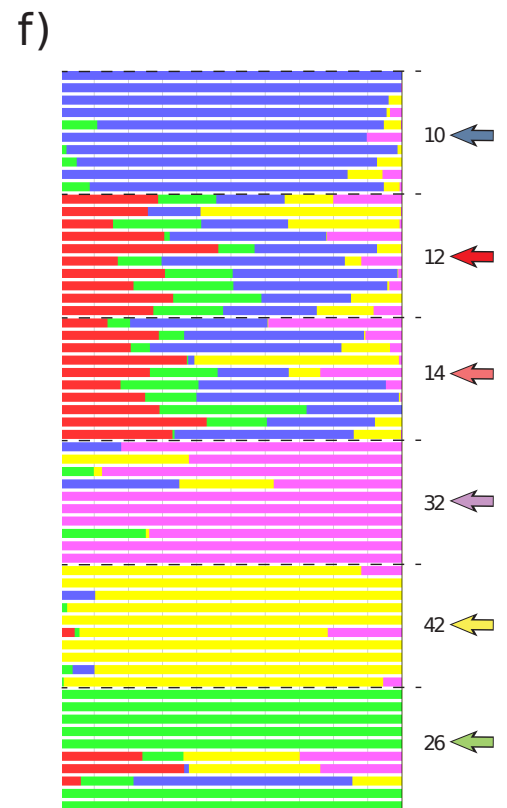

Supplement: 41437_2018_106_MOESM7_ESM.pdf [file 41437_2018_106_MOESM7_ESM.pdf]

**SSR dataset****SNP dataset**

a)

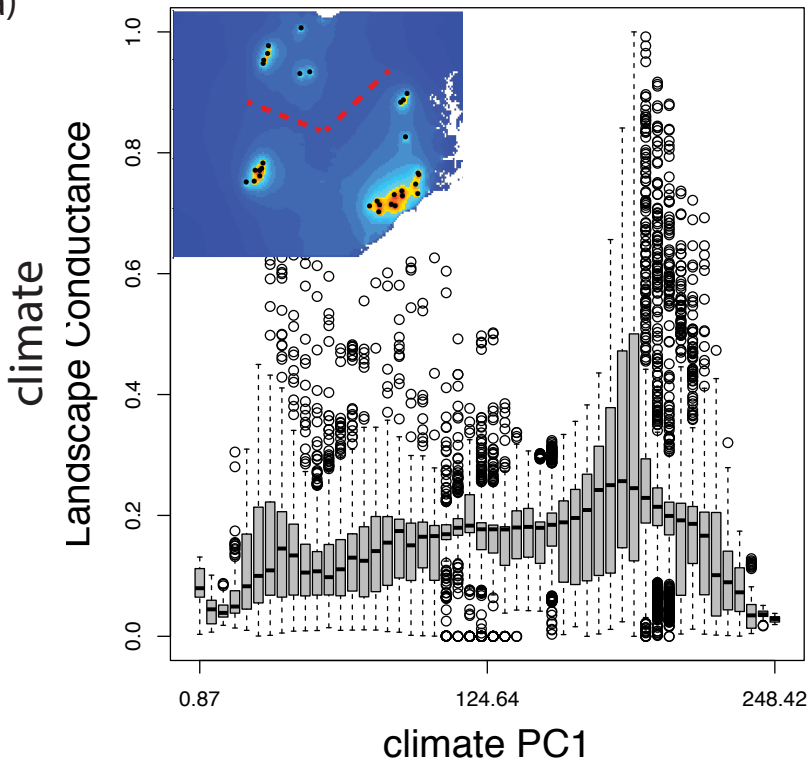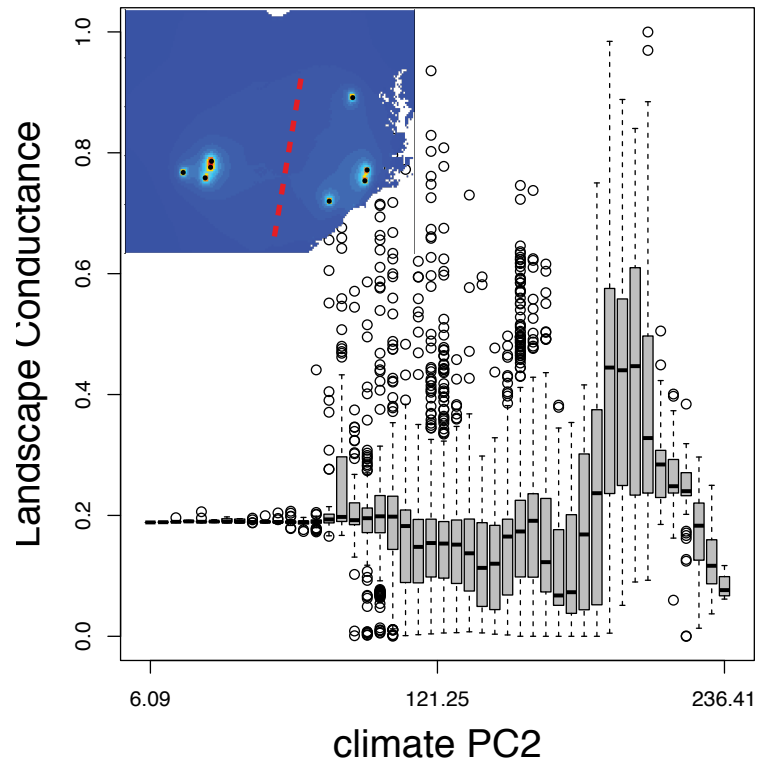

b)

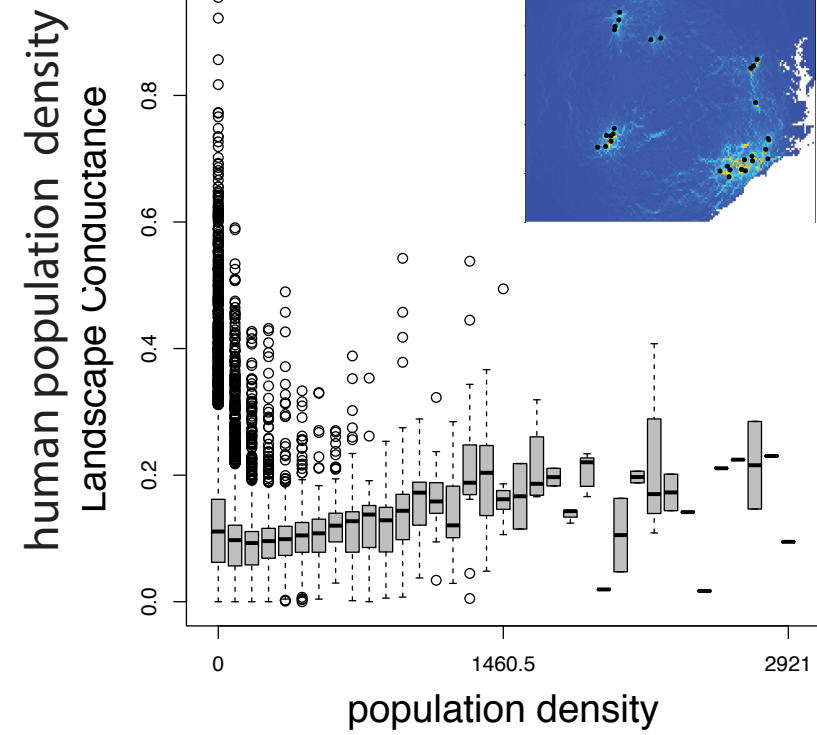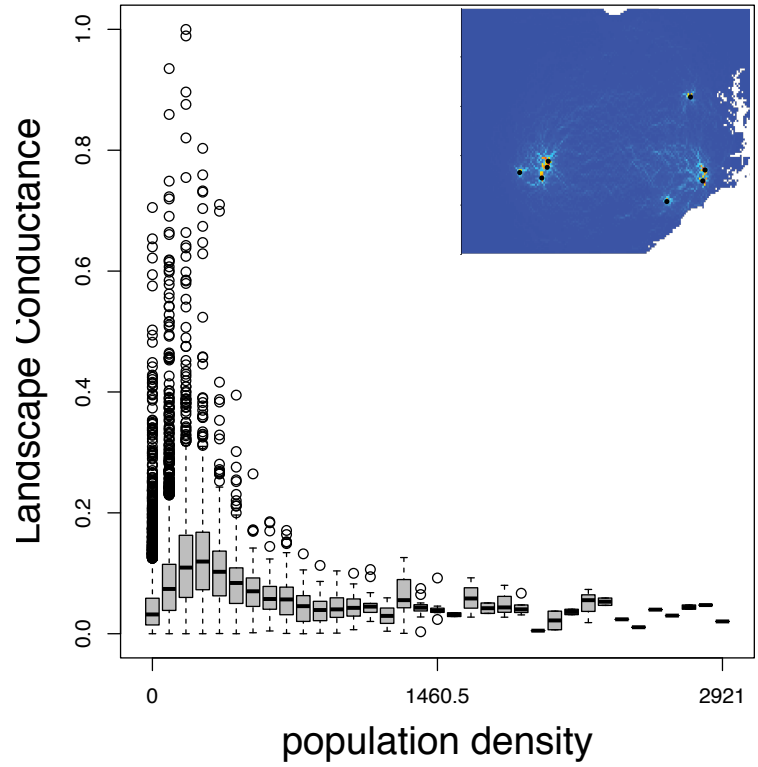

Supplement: 41437_2018_106_MOESM8_ESM.pdf [file 41437_2018_106_MOESM8_ESM.pdf]
